# Supplementary material for: The population genomics of structural variation in a songbird genus
Source: bioRxiv or medRxiv preprint supplement (doi:10.1101/830356), 2019-11-18
Supplement: Supplementary file [file media-1.pdf]

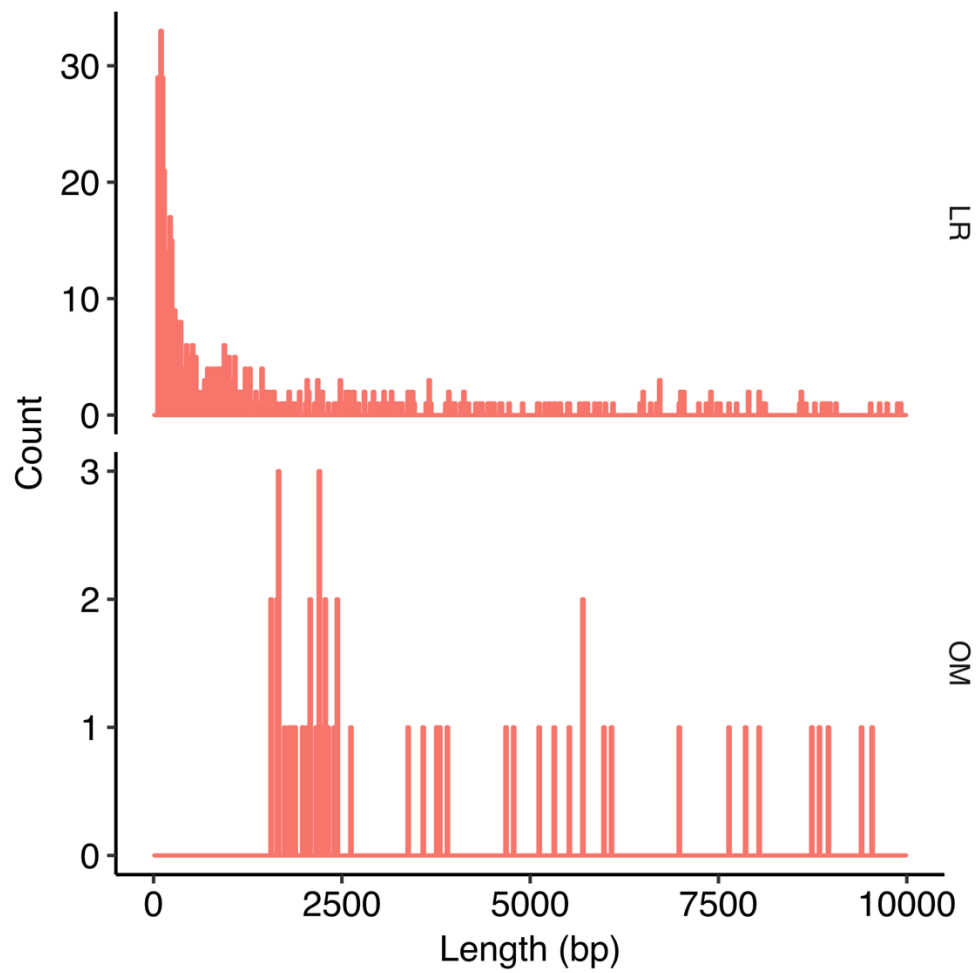

**Fig. S1.** Length distribution of inversions shorter than 10 kb identified with LR (top panel) and OM (bottom panel).

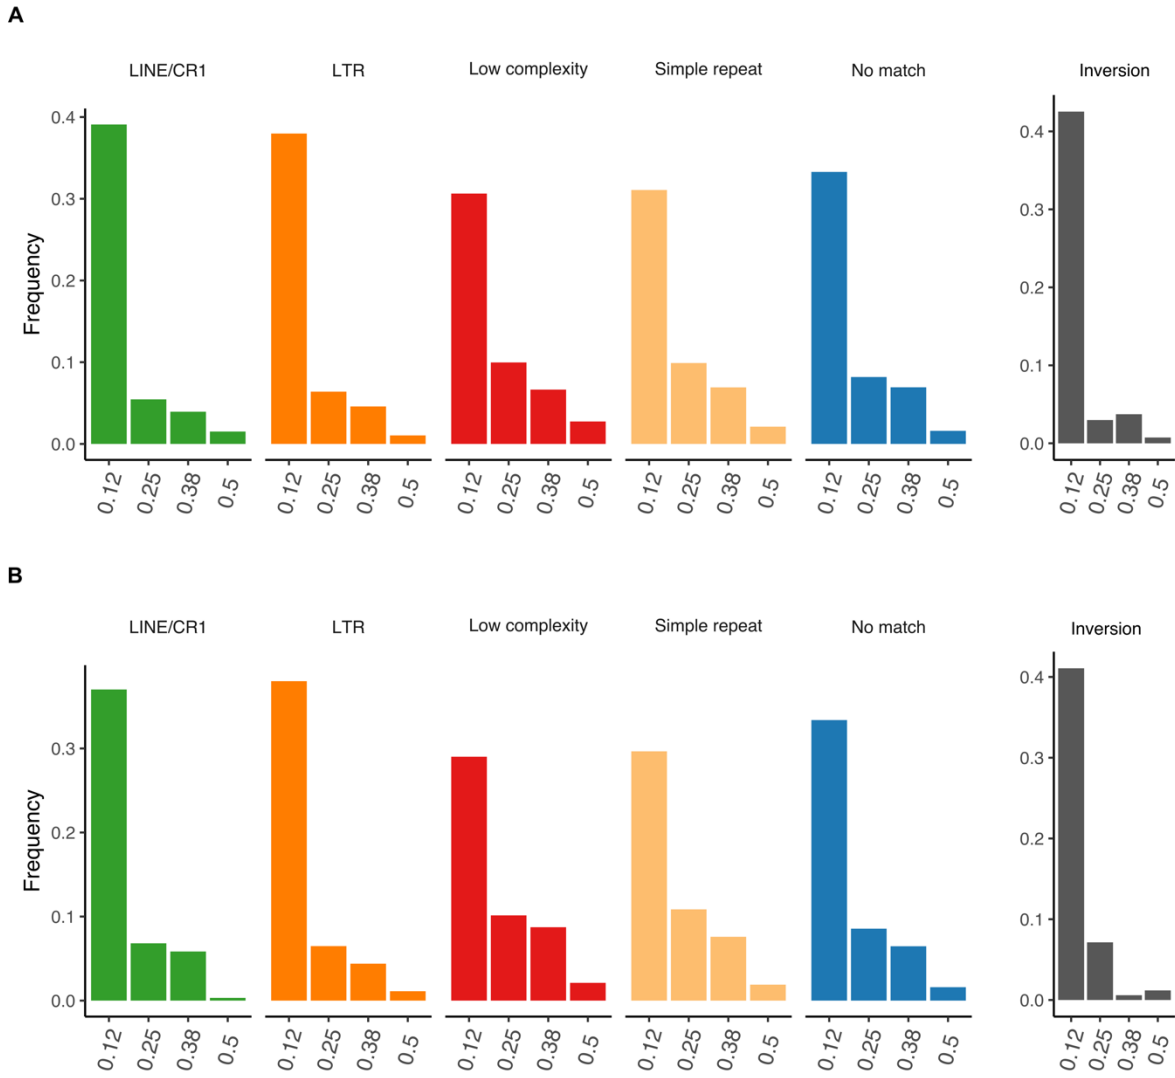

**Fig. S2.**

Folded allele frequency spectra of A, the hooded crow population and B, the German carrion crow population.

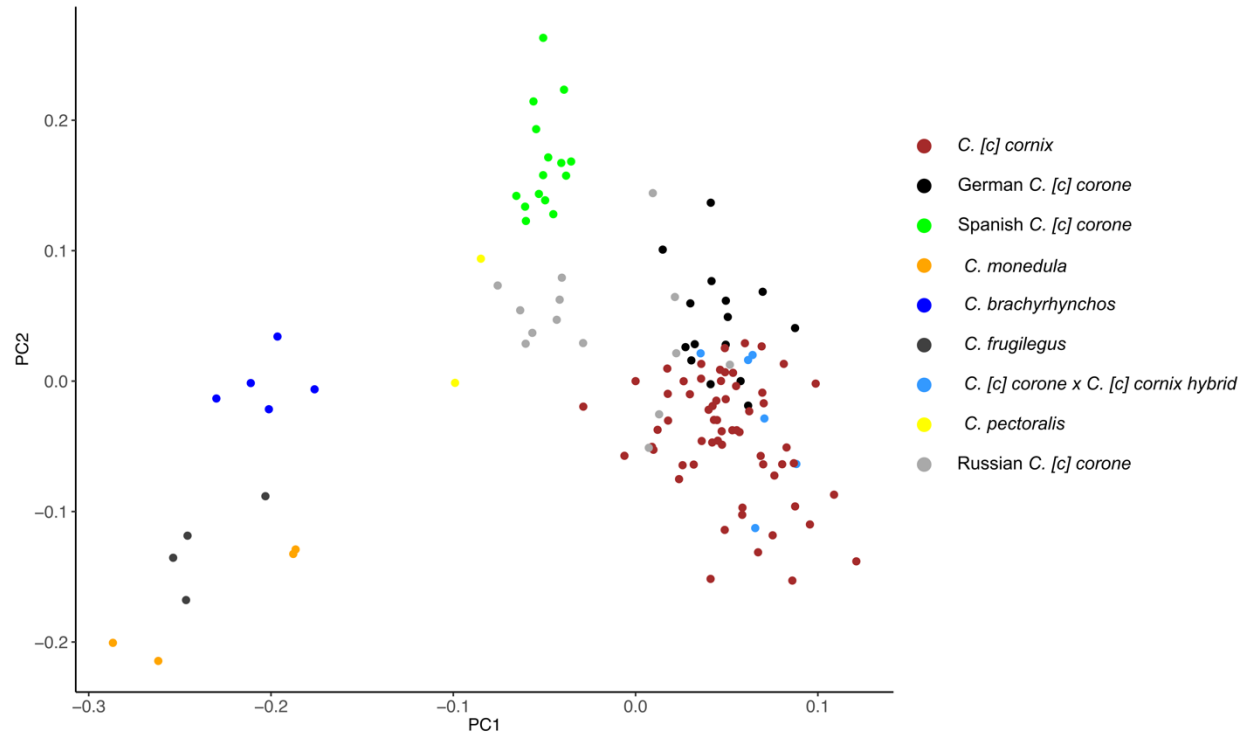

**Fig. S3.**  
Principal component analysis of SV based on SR data.

51 52 53 54 55 56 M 57 58 59 60 61 62 M 63 64 65 66 67 68 M A+ PL+ PR+

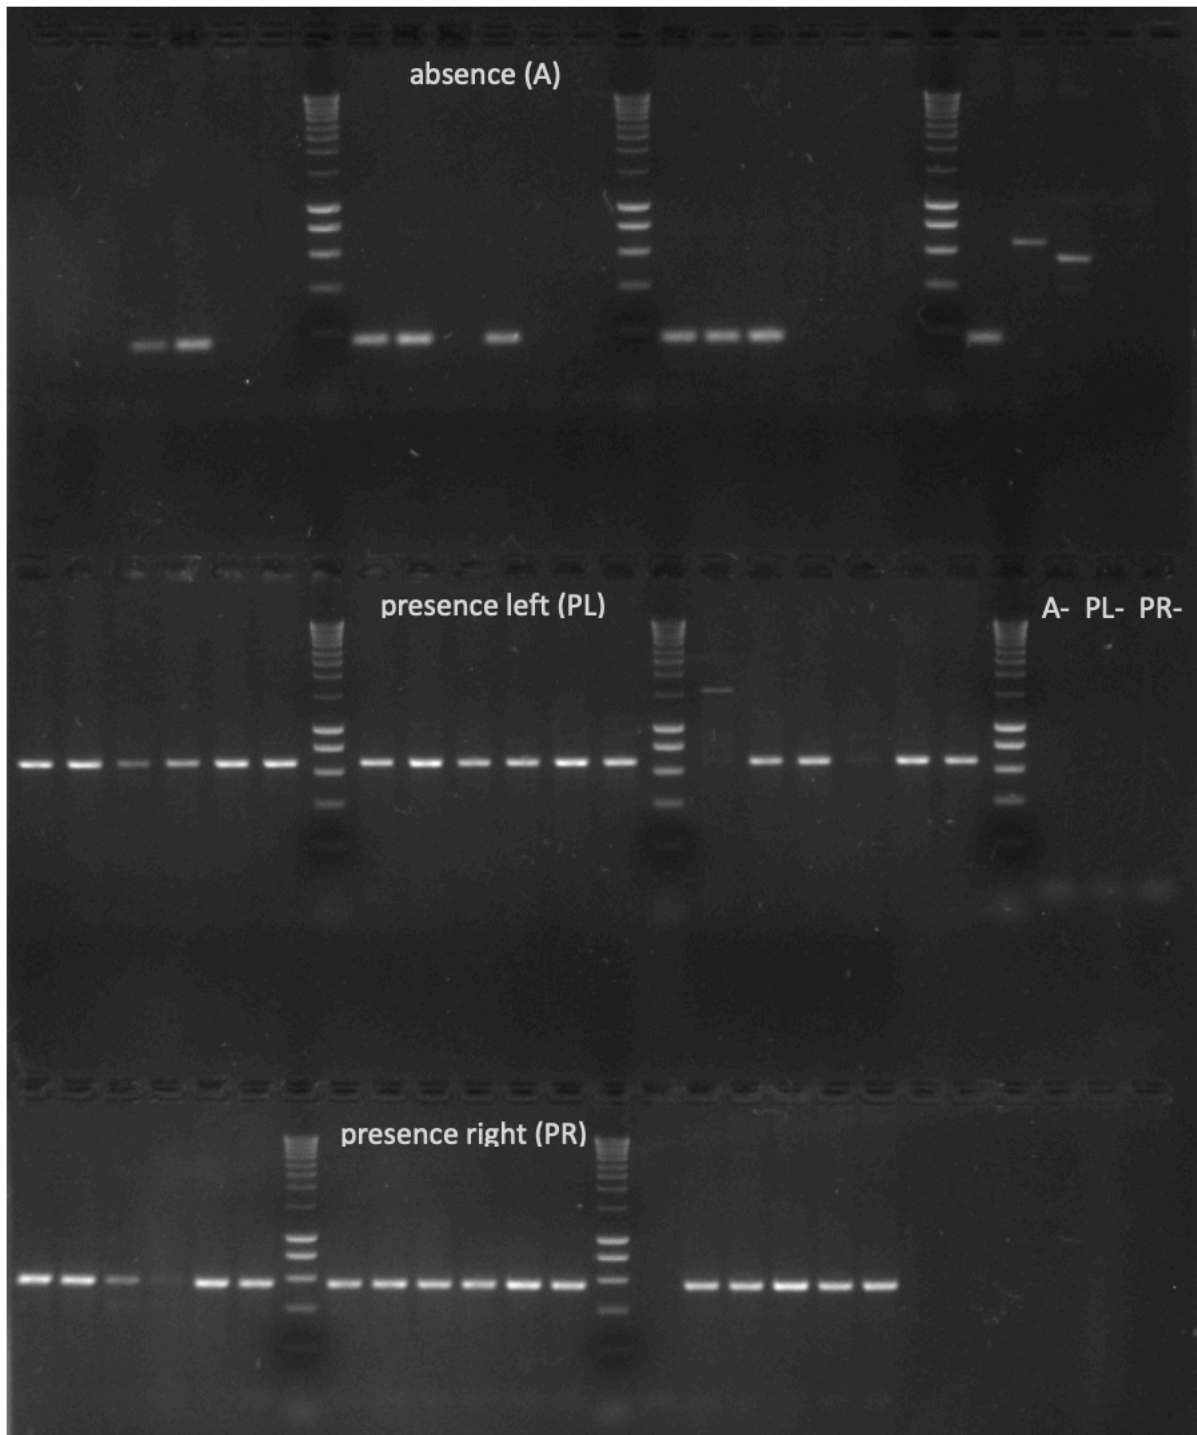

**Fig. S4.**

Representative gel picture of the LTR retrotransposon insertion genotyping in the vicinity of the *NDP* gene on chromosome 1. Numbered columns show focal individual genotyped for three different PCR fragments.

**Table S1.**

Assembly statistics of generated assemblies.

| <b>Assembly</b>                                  | <b>Number of scaffolds</b> | <b>Total length</b> | <b>Longest scaffold</b> | <b>Mean scaffold length</b> | <b>Median scaffold length</b> | <b>Scaffold N50</b> | <b>Number of contigs</b> | <b>Total length</b> | <b>Longest contig</b> | <b>Contig N50</b> | <b>% complete BUSCOs vertebrate</b> | <b>% complete BUSCOs aves</b> |
|--------------------------------------------------|----------------------------|---------------------|-------------------------|-----------------------------|-------------------------------|---------------------|--------------------------|---------------------|-----------------------|-------------------|-------------------------------------|-------------------------------|
| Hooded crow - Super-scaffolded primary assembly  | 48                         | 1037.32             | 154.82                  | 21.61                       | 6.88                          | 74.11               | 810                      | 1033.98             | 33.50                 | 7.83              | 94,39                               | 88,67                         |
| Hooded crow - FALCON UNZIP associated assembly   | -                          | -                   | -                       | -                           | -                             | -                   | 7645                     | 965.95              | 1.80                  | 0.22              | 83,49                               | 78,90                         |
| Jackdaw - Super-scaffolded primary assembly      | 136                        | 1042.43             | 58.30                   | 7.66                        | 3.436                         | 16.38               | 1607                     | 1036.86             | 52.68                 | 12.14             | 93,70                               | 93,70                         |
| Jackdaw - FALCON UNZIP associated assembly       | -                          | -                   | -                       | -                           | -                             | -                   | 6349                     | 1009.69             | 3.10                  | 0.42              | 84,30                               | 84,30                         |
| Hawaiian crow - FALCON UNZIP primary assembly    | -                          | -                   | -                       | -                           | -                             | -                   | 670                      | 1064.97             | 31.53                 | 7.73              | 95,05                               | 95,05                         |
| Hawaiian crow - FALCON UNZIP associated assembly | -                          | -                   | -                       | -                           | -                             | -                   | 2082                     | 432.63              | 9.52                  | 0.45              | 42,65                               | 39,47                         |

**Table S2.**

Long-read sequencing data. Summary of sequencing data generated with PacBio SMRT-sequencing technology.

| <b>Run ID</b>          | <b>Number of reads</b> | <b>Amount sequenced<br/>[Gbp]</b> | <b>Longest read [kbp]</b> | <b>Mean read<br/>length [kbp]</b> | <b>Median read<br/>length [kbp]</b> |
|------------------------|------------------------|-----------------------------------|---------------------------|-----------------------------------|-------------------------------------|
| D_Ko_C29__pb_247_001   | 1319078                | 10,80                             | 78,574                    | 8,187                             | 7,726                               |
| E_Vi_C58__pb_375_006   | 1426456                | 13,54                             | 53,867                    | 9,493                             | 8,682                               |
| S_To_J14__pb_382_001   | 1646343                | 13,18                             | 61,411                    | 8,005                             | 7,252                               |
| S_Up_H24__pb_382_002   | 1543348                | 13,59                             | 67,679                    | 8,805                             | 7,837                               |
| S_Up_H29__pb_382_003   | 1378152                | 13,38                             | 70,966                    | 9,709                             | 8,756                               |
| USA_Wa_B02__pb_383_005 | 2282703                | 18,93                             | 53,388                    | 8,294                             | 7,753                               |
| D_Ko_C04__pb_375_004   | 1388443                | 12,95                             | 69,752                    | 9,328                             | 8,528                               |
| S_Up_H47__pb_382_004   | 1561579                | 14,44                             | 67,569                    | 9,246                             | 8,45                                |
| S_Up_H29__pb_410_002   | 1472021                | 12,19                             | 47,971                    | 8,284                             | 7,298                               |
| E_Vi_C103__pb_410_003  | 1739876                | 12,84                             | 49,815                    | 7,38                              | 6,895                               |
| E_Vi_C57__pb_410_004   | 1668218                | 12,98                             | 51,044                    | 7,778                             | 6,812                               |
| Pl_Wa_H24__pb_410_006  | 1407040                | 13,19                             | 51,352                    | 9,371                             | 8,795                               |
| Pl_Wa_H22__pb_410_005  | 1400972                | 12,92                             | 50,659                    | 9,222                             | 8,814                               |
| D_Ko_C13__pb_410_007   | 1449483                | 13,49                             | 50,611                    | 9,307                             | 9,027                               |
| S_To_J15__pb_410_010   | 1665168                | 12,16                             | 50,03                     | 7,301                             | 6,787                               |
| USA_Wa_B02__pb_410_009 | 1449719                | 12,55                             | 47,961                    | 8,657                             | 8,225                               |
| USA_Wa_B01__pb_410_008 | 1461798                | 12,60                             | 50,766                    | 8,618                             | 8,3                                 |
| S_Up_H24__pb_410_001   | 2155243                | 13,52                             | 46,222                    | 6,272                             | 5,18                                |
| S_Up_H32__pb_210_001   | 1599921                | 12,57                             | 52,426                    | 7,858                             | 6,945                               |
| S_Up_H32__pb_260_002   | 858882                 | 5,71                              | 45,288                    | 6,644                             | 5,916                               |
| S_Up_H32__pb_260_003   | 2307285                | 15,06                             | 47,199                    | 6,527                             | 5,744                               |
| S_Up_H32__pb_260_001   | 4655884                | 29,74                             | 50,116                    | 6,388                             | 5,647                               |
| S_Up_J01__pb_298_001   | 9614265                | 83,33                             | 53,658                    | 8,667                             | 7,923                               |
| S_Up_H03__ps_024_006   | 2526698                | 17,22                             | 87,77                     | 6,814                             | 5,6                                 |
| D_Ko_C36__ps_024_005   | 3684211                | 23,70                             | 88,122                    | 6,433                             | 5,583                               |
| D_Ra_C16__ps_024_002   | 2779764                | 19,33                             | 98,694                    | 6,955                             | 6,209                               |

|                        |           |        |             |        |       |
|------------------------|-----------|--------|-------------|--------|-------|
| D_Ko_C15__ps_024_008   | 2851263   | 16,85  | 144,589     | 5,91   | 4,965 |
| S_To_J10__ps_024_010   | 4590885   | 28,05  | 99,725      | 6,109  | 4,886 |
| D_Ko_C31__ps_024_009   | 3888521   | 27,36  | 113,93      | 7,036  | 5,456 |
| S_Up_H37__ps_024_007   | 3248427   | 21,08  | 94,114      | 6,49   | 6,004 |
| S_To_J13__ps_024_019   | 4971825   | 32,39  | 104,698     | 6,513  | 5,659 |
| S_Up_H59__ps_024_022   | 4447600   | 31,70  | 106,717     | 7,127  | 5,921 |
| D_Ra_C05__ps_024_021   | 4463592   | 30,86  | 116,395     | 6,913  | 5,655 |
| E_Vi_C98__ps_038_001   | 2403048   | 16,58  | 77,51       | 6,898  | 5,415 |
| E_Vi_C101__ps_038_004  | 3123591   | 19,89  | 97,839      | 6,368  | 5,098 |
| E_Vi_C100__ps_038_002  | 4011123   | 22,76  | 80,83       | 5,675  | 5,339 |
| RUS_Mp_D06__ps_038_007 | 2106565   | 21,14  | 92,069      | 10,034 | 7,805 |
| RUS_Mp_D08__ps_038_006 | 4114486   | 21,48  | 85,377      | 5,219  | 5,676 |
| RUS Mp D04 ps 038 005  | 3524965   | 18,73  | 73,561      | 5,314  | 5,104 |
| Total                  | 104188441 | 754,80 | 72,57087179 | 7,5347 | 6,719 |

**Table S3.**

Frequencies of individual repeat motifs in filtered insertions and deletions.

| <b>Repeat ID</b>      | <b>Frequency</b> | <b>Repeat class</b> | <b>Length</b> |
|-----------------------|------------------|---------------------|---------------|
| TguERVK7-La_corCor    | 1310             | LTR                 | 670           |
| TguLTRL2-Lc_corCor    | 1039             | LTR                 | 1315          |
| TguERV1-Ld_I_corCor   | 838              | LTR                 | 6022          |
| TguERV2-La_corCor     | 722              | LTR                 | 564           |
| TguERV2-Le_corCor     | 712              | LTR                 | 906           |
| A-rich                | 646              | Low_complexity      | NA            |
| (T)n                  | 620              | Simple_repeat       | NA            |
| GA-rich               | 492              | Low_complexity      | NA            |
| corCorLTRK23a         | 445              | LTR                 | 294           |
| G-rich                | 435              | Low_complexity      | NA            |
| corCorLTRK15a         | 414              | LTR                 | 966           |
| (A)n                  | 400              | Simple_repeat       | 180           |
| corCorLTRK12a         | 379              | LTR                 | 481           |
| corCorLTRK13a         | 349              | LTR                 | 575           |
| lycPyrLTRL11          | 323              | LTR                 | 1238          |
| TguLTRL1-La_corCor    | 323              | LTR                 | 640           |
| (TA)n                 | 258              | Simple_repeat       | 180           |
| (C)n                  | 214              | Simple_repeat       | NA            |
| corCorLTRK17a_LTR     | 211              | LTR                 | 375           |
| (AT)n                 | 195              | Simple_repeat       | NA            |
| corCorLTR1a           | 180              | LTR                 | 461           |
| (G)n                  | 171              | Simple_repeat       | 180           |
| TguLTRL2-La_corCor    | 171              | LTR                 | 1303          |
| corCorLTRK1_I         | 163              | LTR                 | 1736          |
| TguERV1-Lc_LTR_corCor | 159              | LTR                 | 299           |
| (CCTT)n               | 118              | Simple_repeat       | NA            |
| (GGAA)n               | 114              | Simple_repeat       | 180           |
| CR1-E1_fAlb           | 107              | LINE/CR1            | 437           |
| CR1-J2_Pass           | 107              | LINE/CR1            | 4277          |
| (TTCC)n               | 104              | Simple_repeat       | NA            |
| TguLTRL4a             | 103              | LTR                 | 1154          |



**Table S4.**

FST outliers in the all-black German carrion crow and black-and-gray hooded crow comparison based on LR variants.

| <b>Chromosome</b>                        | <b>Position</b> | <b>Type</b> | <b>Length</b> | <b>FST</b> | <b>Gene downstream</b> | <b>Distance</b> | <b>Gene upstream</b> | <b>Distance</b> |
|------------------------------------------|-----------------|-------------|---------------|------------|------------------------|-----------------|----------------------|-----------------|
| Super-Scaffold_9_Super-Scaffold_99_chr18 | 10083548        | DEL         | 86            | 0.812405   | SLC16A6                | -26679          | ARSG                 | 301             |
| Sc8eucV_19_HRSCAF_154_chr3               | 78483754        | DEL         | 1563          | 0.666196   | GABRR2                 | -9425           | UBE2J1               | 850             |
| Sc8eucV_16_HRSCAF_138_chr1               | 112179329       | DEL         | 2255          | 0.616612   | NDP                    | -26270          | EFHC2                | 37138           |
| Sc8eucV_12_HRSCAF_113_chr4A              | 10168413        | DEL         | 659           | 0.556894   | GRIA3                  | -204950         | MCTS1                | 304532          |
| Sc8eucV_10_HRSCAF_100_chr15              | 9876103         | INS         | 920           | 0.542418   | SLC5A1                 | -25446          | YWHAH                | 2969            |
| Sc8eucV_6_HRSCAF_52_chr8                 | 81990           | DEL         | 1338          | 0.542418   | SLC44A5                | 0               | SLC44A5              | 0               |
| Super-Scaffold_9_Super-Scaffold_99_chr18 | 9080135         | INS         | 56            | 0.542418   | LOC104696015           | -966            | BPTF                 | 15959           |
| Sc8eucV_21_HRSCAF_161_chr4               | 30401968        | DEL         | 819           | 0.528082   | GIMD1                  | -91886          | DKK2                 | 43851           |
| Super-Scaffold_9_Super-Scaffold_99_chr18 | 10160422        | DEL         | 608           | 0.515687   | FAM20A                 | -9970           | LOC104693358         | 21836           |
| Sc8eucV_28_HRSCAF_204_chrZ               | 42855849        | DEL         | 6523          | 0.498962   | IFT74                  | -436763         | CAAP1                | 402328          |
| Sc8eucV_17_HRSCAF_144_chr12              | 14067812        | INS         | 134           | 0.498818   | PSMD6                  | -25685          | PRICKLE2             | 3640            |
| Sc8eucV_41_HRSCAF_239_chr2               | 11673240        | DEL         | 115           | 0.45518    | PITRM1                 | -102277         | PFKP                 | 132560          |
| Sc8eucV_21_HRSCAF_161_chr4               | 10686903        | DEL         | 1481          | 0.453426   | MAML3                  | -18719          | MGST2                | 32272           |
| Sc8eucV_19_HRSCAF_154_chr3               | 93939333        | INS         | 58            | 0.439911   | NA                     | NA              | NA                   | NA              |
| Sc8eucV_28_HRSCAF_204_chrZ               | 34154260        | DEL         | 567           | 0.437665   | NA                     | NA              | NA                   | NA              |
| Sc8eucV_16_HRSCAF_138_chr1               | 435789          | DEL         | 100           | 0.430649   | SLAMF9                 | -79446          | LOC104698121         | 31026           |
| Sc8eucV_20_HRSCAF_160_chr1A              | 22139103        | DEL         | 74            | 0.430649   | PTPRZ1                 | 0               | PTPRZ1               | 0               |
| Super-Scaffold_9_Super-Scaffold_99_chr18 | 6551090         | INS         | 92            | 0.430649   | CA10                   | -972            | UTP18                | 282159          |
| Super-Scaffold_9_Super-Scaffold_99_chr18 | 9954827         | INS         | 64            | 0.427794   | AXIN2                  | -95524          | RGS9                 | 14188           |
| Sc8eucV_10_HRSCAF_100_chr15              | 1130347         | INS         | 119           | 0.425766   | GLT1D1                 | -31874          | SLC15A4              | 8750            |
| Sc8eucV_14_HRSCAF_135_chr10              | 18758127        | DEL         | 70            | 0.425766   | MPI                    | -16805          | SCAMP2               | 4290            |

|                                          |          |     |      |          |              |         |              |        |
|------------------------------------------|----------|-----|------|----------|--------------|---------|--------------|--------|
| Sc8eucV_20_HRSCAF_160_chr1A              | 40984218 | INS | 295  | 0.425766 | SLC6A15      | -13521  | TSPAN19      | 43707  |
| Sc8eucV_19_HRSCAF_154_chr3               | 64545414 | DEL | 3696 | 0.42464  | MAN1A1       | -326161 | TBC1D32      | 296556 |
| Sc8eucV_19_HRSCAF_154_chr3               | 43076707 | DEL | 569  | 0.417853 | DISC1        | 0       | DISC1        | 0      |
| Sc8eucV_22_HRSCAF_163_chr9               | 24812560 | DEL | 289  | 0.414455 | PCCB         | -20580  | PPP2R3A      | 13552  |
| Sc8eucV_12_HRSCAF_113_chr4A              | 1505992  | DEL | 114  | 0.408223 | LOC104691275 | -372    | EDA2R        | 21394  |
| Sc8eucV_5_HRSCAF_38_chr7                 | 1789800  | DEL | 221  | 0.408223 | MMADHC       | -26020  | LYPD6        | 40702  |
| Sc8eucV_12_HRSCAF_113_chr4A              | 16945599 | DEL | 129  | 0.407186 | LOC104691732 | -34917  | PIH1D3       | 21123  |
| Sc8eucV_12_HRSCAF_113_chr4A              | 8868927  | DEL | 215  | 0.407186 | NRK          | 0       | NRK          | 0      |
| Sc8eucV_41_HRSCAF_239_chr2               | 31827203 | DEL | 162  | 0.388603 | ELMO1        | 0       | ELMO1        | 0      |
| Sc8eucV_19_HRSCAF_154_chr3               | 56433950 | DEL | 597  | 0.388519 | ESR1         | 0       | ESR1         | 0      |
| Sc8eucV_2_HRSCAF_5_chr5                  | 37341942 | DEL | 400  | 0.387775 | LOC104698601 | 0       | LOC104698601 | 0      |
| Sc8eucV_2_HRSCAF_5_chr5                  | 47984643 | DEL | 143  | 0.387279 | TH           | -15362  | LOC104687704 | 119783 |
| Sc8eucV_11_HRSCAF_110_chr11              | 2373236  | INS | 131  | 0.381214 | GSE1         | -22151  | GINS2        | 40332  |
| Sc8eucV_6_HRSCAF_52_chr8                 | 478781   | DEL | 93   | 0.381214 | NEGR1        | -61593  | ERICH3       | 227018 |
| Super-Scaffold_8_Super-Scaffold_98_chr28 | 1864815  | INS | 149  | 0.381214 | ADAMTS10     | -72880  | ZAP70        | 35464  |
| Sc8eucV_21_HRSCAF_161_chr4               | 41662680 | DEL | 7777 | 0.379839 | SORBS2       | -384955 | MTNR1A       | 95511  |
| Sc8eucV_41_HRSCAF_239_chr2               | 47695276 | INS | 146  | 0.379596 | IL6          | -10879  | LOC104689112 | 21839  |
| Sc8eucV_16_HRSCAF_138_chr1               | 2398759  | INS | 68   | 0.37461  | LOC104689368 | -75896  | LOC104689433 | 39839  |
| Sc8eucV_2_HRSCAF_5_chr5                  | 38174309 | DEL | 135  | 0.372993 | RTF1         | 0       | RTF1         | 0      |
| Sc8eucV_41_HRSCAF_239_chr2               | 84746331 | INS | 80   | 0.372993 | COBL         | -357811 | LOC104685918 | 289065 |
| Sc8eucV_6_HRSCAF_52_chr8                 | 1129691  | DEL | 79   | 0.372993 | LOC104695493 | -2511   | WLS          | 2023   |
| Sc8eucV_2_HRSCAF_5_chr5                  | 15012660 | INS | 75   | 0.371391 | PPP4R4       | 0       | PPP4R4       | 0      |
| Sc8eucV_11_HRSCAF_110_chr11              | 14615394 | INS | 59   | 0.366293 | LOC104687436 | -3416   | POP4         | 358    |
| Sc8eucV_19_HRSCAF_154_chr3               | 54586748 | DEL | 61   | 0.365118 | NOX3         | -113289 | CLDN20       | 189881 |
| Super-Scaffold_8_Super-Scaffold_98_chr28 | 3607722  | DEL | 90   | 0.365118 | LOC104697075 | 0       | LOC104697075 | 0      |
| Super-Scaffold_9_Super-Scaffold_99_chr18 | 10166476 | INS | 151  | 0.365118 | FAM20A       | -16024  | LOC104696001 | 23298  |
| Super-Scaffold_9_Super-Scaffold_99_chr18 | 10244723 | DEL | 91   | 0.365118 | LOC104696000 | -7678   | ABCA5        | 1943   |
| Super-Scaffold_143_chr26                 | 6291854  | INS | 282  | 0.357143 | PPFIA4       | 0       | PPFIA4       | 0      |

|                                          |           |     |      |          |              |         |              |        |
|------------------------------------------|-----------|-----|------|----------|--------------|---------|--------------|--------|
| Sc8eucV_16_HRSCAF_138_chr1               | 8432823   | INS | 916  | 0.351229 | ROBO1        | -235266 | LOC104689417 | 266974 |
| Sc8eucV_20_HRSCAF_160_chr1A              | 27000693  | DEL | 2184 | 0.351229 | IMMP2L       | 0       | IMMP2L       | 0      |
| Sc8eucV_21_HRSCAF_161_chr4               | 11319706  | INS | 52   | 0.351229 | RNF150       | -822    | LOC104697268 | 95611  |
| Sc8eucV_2_HRSCAF_5_chr5                  | 564728    | INS | 100  | 0.351229 | FAM179B      | -211063 | KLHL28       | 169095 |
| Sc8eucV_41_HRSCAF_239_chr2               | 9079818   | INS | 460  | 0.351229 | LOC104686440 | 0       | LOC104686440 | 0      |
| Sc8eucV_7_HRSCAF_58_chr13                | 1843425   | DEL | 448  | 0.351229 | LOC104689637 | -6048   | SLC26A2      | 8279   |
| Sc8eucV_16_HRSCAF_138_chr1               | 60691922  | DEL | 912  | 0.34902  | LOC104693136 | -557782 | DIAPH3       | 298389 |
| Sc8eucV_22_HRSCAF_163_chr9               | 24517238  | DEL | 2864 | 0.34902  | MAP3K13      | 0       | MAP3K13      | 0      |
| Super-Scaffold_9_Super-Scaffold_99_chr18 | 5715351   | DEL | 51   | 0.34902  | ACSF2        | 0       | ACSF2        | 0      |
| Sc8eucV_11_HRSCAF_110_chr11              | 2409601   | DEL | 149  | 0.345105 | GSE1         | 0       | GSE1         | 0      |
| Sc8eucV_16_HRSCAF_138_chr1               | 47207238  | INS | 74   | 0.340705 | WASF3        | -4322   | CDK8         | 45576  |
| Sc8eucV_6_HRSCAF_52_chr8                 | 23785773  | DEL | 300  | 0.340705 | LOC104695422 | -48461  | CDC73        | 9165   |
| Sc8eucV_41_HRSCAF_239_chr2               | 74069849  | INS | 384  | 0.340533 | CDH9         | 0       | CDH9         | 0      |
| Sc8eucV_12_HRSCAF_113_chr4A              | 13659348  | DEL | 54   | 0.339498 | LOC104691679 | 0       | LOC104691679 | 0      |
| Sc8eucV_5_HRSCAF_38_chr7                 | 982205    | INS | 92   | 0.337316 | DRC1         | -14449  | GALNT13      | 55917  |
| Sc8eucV_41_HRSCAF_239_chr2               | 101128609 | INS | 324  | 0.336903 | NA           | NA      | NA           | NA     |
| Sc8eucV_28_HRSCAF_204_chrZ               | 73797802  | INS | 73   | 0.330544 | EDIL3        | -406650 | LOC104695841 | 282404 |
| Sc8eucV_20_HRSCAF_160_chr1A              | 67154259  | INS | 51   | 0.329462 | PRR5         | 0       | PRR5         | 0      |
| Sc8eucV_28_HRSCAF_204_chrZ               | 13197166  | INS | 573  | 0.329462 | RAI14        | 0       | RAI14        | 0      |
| Sc8eucV_2_HRSCAF_5_chr5                  | 5602372   | DEL | 830  | 0.329462 | PRKCH        | -64676  | SLC38A6      | 52965  |
| Sc8eucV_6_HRSCAF_52_chr8                 | 10448114  | DEL | 60   | 0.329462 | IPO13        | -9585   | ST3GAL3      | 4992   |
| Super-Scaffold_9_Super-Scaffold_99_chr18 | 7026905   | INS | 97   | 0.329462 | LOC104694274 | -17172  | LOC104694356 | 204630 |
| Sc8eucV_2_HRSCAF_5_chr5                  | 28446815  | DEL | 53   | 0.326572 | LOC104684460 | -210386 | LOC104684431 | 41038  |
| Super-Scaffold_9_Super-Scaffold_99_chr18 | 2181334   | DEL | 184  | 0.326572 | LOC104695636 | -20399  | LOC104695682 | 1877   |
| Sc8eucV_20_HRSCAF_160_chr1A              | 29292175  | INS | 55   | 0.321524 | ADAMTS20     | 0       | ADAMTS20     | 0      |
| Sc8eucV_19_HRSCAF_154_chr3               | 77188793  | DEL | 6950 | 0.321188 | MAP3K7       | -695846 | EPHA7        | 397902 |
| Sc8eucV_2_HRSCAF_5_chr5                  | 6552052   | INS | 108  | 0.321188 | WDR89        | 0       | WDR89        | 0      |
| Sc8eucV_41_HRSCAF_239_chr2               | 26678831  | DEL | 1164 | 0.321188 | MRPL32       | -103684 | LOC104688910 | 82671  |

|                              |           |     |      |          |              |         |              |        |
|------------------------------|-----------|-----|------|----------|--------------|---------|--------------|--------|
| Sc8eucV_19_HRSCAF_154__chr3  | 114426297 | DEL | 89   | 0.319956 | DTNB         | 0       | DTNB         | 0      |
| Sc8eucV_10_HRSCAF_100__chr15 | 11369903  | DEL | 584  | 0.315981 | LOC104694978 | -111902 | AIFM3        | 200211 |
| Super-Scaffold_503__chr27    | 4947702   | DEL | 192  | 0.313759 | LOC104685769 | 0       | LOC104685769 | 0      |
| Sc8eucV_19_HRSCAF_154__chr3  | 66564293  | INS | 160  | 0.312588 | NT5DC1       | -214535 | FRK          | 151867 |
| Sc8eucV_1_HRSCAF_4__chr6     | 16956472  | INS | 79   | 0.312588 | KIF20B       | 0       | KIF20B       | 0      |
| Sc8eucV_21_HRSCAF_161__chr4  | 55571864  | INS | 155  | 0.312588 | PPARGC1A     | -48196  | LOC104690704 | 53198  |
| Sc8eucV_20_HRSCAF_160__chr1A | 10564911  | DEL | 621  | 0.311616 | GNAI1        | -144700 | GNAT3        | 241037 |
| Sc8eucV_6_HRSCAF_52__chr8    | 29238870  | DEL | 1209 | 0.311616 | CCDC180      | -528731 | LOC104693596 | 37188  |
| Sc8eucV_5_HRSCAF_38__chr7    | 33426000  | DEL | 7076 | 0.307692 | ZNF804A      | -178769 | LOC104698251 | 112821 |
| Sc8eucV_13_HRSCAF_122__chr20 | 1264893   | DEL | 190  | 0.306888 | LOC104698034 | -2824   | LOC104698050 | 42840  |
| Sc8eucV_16_HRSCAF_138__chr1  | 24035795  | DEL | 383  | 0.306888 | LSAMP        | -150407 | GAP43        | 481899 |
| Sc8eucV_41_HRSCAF_239__chr2  | 61742801  | DEL | 699  | 0.306143 | CDKAL1       | 0       | CDKAL1       | 0      |
| Sc8eucV_18_HRSCAF_152__chr22 | 4681012   | DEL | 145  | 0.305817 | LOC104693230 | 0       | LOC104693230 | 0      |
| Sc8eucV_19_HRSCAF_154__chr3  | 91662759  | DEL | 122  | 0.305817 | LOC104693575 | -4823   | LOC104693569 | 6609   |
| Sc8eucV_19_HRSCAF_154__chr3  | 59802741  | INS | 52   | 0.3027   | EPB41L2      | -985    | SMLR1        | 118199 |
| Sc8eucV_20_HRSCAF_160__chr1A | 72391930  | DEL | 67   | 0.3027   | CACNA1C      | 0       | CACNA1C      | 0      |
| Sc8eucV_28_HRSCAF_204__chrZ  | 41910148  | DEL | 58   | 0.3027   | SLC12A2      | -121109 | LOC104691976 | 24998  |
| Sc8eucV_28_HRSCAF_204__chrZ  | 658358    | INS | 220  | 0.3027   | TCF4         | 0       | TCF4         | 0      |
| Sc8eucV_16_HRSCAF_138__chr1  | 57452531  | DEL | 1336 | 0.301669 | DGKH         | -1802   | RGCC         | 329040 |
| Sc8eucV_2_HRSCAF_5__chr5     | 45053086  | DEL | 136  | 0.301417 | LRP5         | 0       | LRP5         | 0      |

**Table S5.**

Detailed sample information on sequenced and mapped individuals.

| <b>Genus</b> | <b>Species</b> | <b>Individual ID</b> | <b>Tissue</b> | <b>Sampling location</b>                    | <b>Sequencing Instrument</b> |
|--------------|----------------|----------------------|---------------|---------------------------------------------|------------------------------|
| Corvus       | brachyrhynchos | USA_CA_B01           | tissue, blood | USA, California, Shasty County              | Illumina HiSeq2000           |
| Corvus       | brachyrhynchos | USA_CA_B03           | tissue, blood | USA, California, Shasta, Cottonwood         | Illumina HiSeq2001           |
| Corvus       | brachyrhynchos | USA_CA_B08           | unknown       | USA, California                             | Illumina HiSeq2002           |
| Corvus       | brachyrhynchos | USA_NJ_B02           | tissue, blood | USA, New Jersey, Union County,<br>Westfield | Illumina HiSeq2003           |
| Corvus       | brachyrhynchos | USA_NY_B03           | tissue, blood | USA, New York, Suffolk County,<br>Northport | Illumina HiSeq2004           |
| Corvus       | brachyrhynchos | USA_NY_B04           | tissue, blood | USA, New York, Nassau County,<br>Wantagh    | Illumina HiSeq2005           |
| Corvus       | corone cornix  | B_So_H01             | blood         | Bulgaria, Sofia                             | Illumina HiSeq2006           |
| Corvus       | corone cornix  | B_So_H02             | blood         | Bulgaria, Sofia                             | Illumina HiSeq2007           |
| Corvus       | corone cornix  | B_So_H03             | blood         | Bulgaria, Sofia                             | Illumina HiSeq2008           |
| Corvus       | corone cornix  | B_So_H04             | blood         | Bulgaria, Sofia                             | Illumina HiSeq2009           |
| Corvus       | corone cornix  | B_SZ_H01             | blood         | Bulgaria, Stora Zagora                      | Illumina HiSeq2010           |
| Corvus       | corone cornix  | B_SZ_H02             | blood         | Bulgaria, Stora Zagora                      | Illumina HiSeq2011           |
| Corvus       | corone cornix  | B_un_H01             | blood         | Bulgaria                                    | Illumina HiSeq2012           |
| Corvus       | corone cornix  | ISR_TA_H01           | blood         | Israel, Tel Aviv                            | Illumina HiSeq2013           |
| Corvus       | corone cornix  | ISR_TA_H02           | blood         | Israel, Tel Aviv                            | Illumina HiSeq2014           |
| Corvus       | corone cornix  | ISR_TA_H04           | blood         | Israel, Tel Aviv                            | Illumina HiSeq2015           |
| Corvus       | corone cornix  | ITA_Ro_H01           | blood         | Italy, Rome                                 | Illumina HiSeq2016           |
| Corvus       | corone cornix  | ITA_Ro_H02           | blood         | Italy, Rome                                 | Illumina HiSeq2017           |
| Corvus       | corone cornix  | ITA_Ro_H03           | blood         | Italy, Rome                                 | Illumina HiSeq2018           |
| Corvus       | corone cornix  | ITA_Ro_H04           | blood         | Italy, Rome                                 | Illumina HiSeq2019           |
| Corvus       | corone cornix  | ITA_Ro_H05           | blood         | Italy, Rome                                 | Illumina HiSeq2020           |
| Corvus       | corone cornix  | ITA_Ro_H06           | blood         | Italy, Rome                                 | Illumina HiSeq2021           |
| Corvus       | corone cornix  | ITA_Ro_H07           | blood         | Italy, Rome                                 | Illumina HiSeq2022           |
| Corvus       | corone cornix  | ITA_Ro_H08           | blood         | Italy, Rome                                 | Illumina HiSeq2023           |
| Corvus       | corone cornix  | ITA_Ro_H09           | tissue        | Italy, Rome                                 | Illumina HiSeq2024           |

|        |               |            |        |                     |                    |
|--------|---------------|------------|--------|---------------------|--------------------|
| Corvus | corone cornix | ITA_Ro_H10 | tissue | Italy, Rome         | Illumina HiSeq2025 |
| Corvus | corone cornix | ITA_Ro_H11 | tissue | Italy, Rome         | Illumina HiSeq2026 |
| Corvus | corone cornix | ITA_Ro_H12 | tissue | Italy, Rome         | Illumina HiSeq2027 |
| Corvus | corone cornix | ITA_Ro_H13 | tissue | Italy, Rome         | Illumina HiSeq2028 |
| Corvus | corone cornix | ITA_Ro_H14 | tissue | Italy, Rome         | Illumina HiSeq2029 |
| Corvus | corone cornix | PL_Wa_H02  | blood  | Poland, Warsaw      | Illumina HiSeq2030 |
| Corvus | corone cornix | PL_Wa_H03  | blood  | Poland, Warsaw      | Illumina HiSeq2031 |
| Corvus | corone cornix | PL_Wa_H05  | blood  | Poland, Warsaw      | Illumina HiSeq2032 |
| Corvus | corone cornix | PL_Wa_H06  | blood  | Poland, Warsaw      | Illumina HiSeq2033 |
| Corvus | corone cornix | PL_Wa_H09  | blood  | Poland, Warsaw      | Illumina HiSeq2034 |
| Corvus | corone cornix | PL_Wa_H11  | blood  | Poland, Warsaw      | Illumina HiSeq2035 |
| Corvus | corone cornix | PL_Wa_H14  | blood  | Poland, Warsaw      | Illumina HiSeq2036 |
| Corvus | corone cornix | PL_Wa_H16  | blood  | Poland, Warsaw      | Illumina HiSeq2037 |
| Corvus | corone cornix | PL_Wa_H17  | blood  | Poland, Warsaw      | Illumina HiSeq2038 |
| Corvus | corone cornix | PL_Wa_H22  | blood  | Poland, Warsaw      | Illumina HiSeq2039 |
| Corvus | corone cornix | PL_Wa_H23  | blood  | Poland, Warsaw      | Illumina HiSeq2040 |
| Corvus | corone cornix | PL_Wa_H32  | blood  | Poland, Warsaw      | Illumina HiSeq2041 |
| Corvus | corone cornix | PL_Wa_H35  | blood  | Poland, Warsaw      | Illumina HiSeq2042 |
| Corvus | corone cornix | PL_Wa_H50  | blood  | Poland, Warsaw      | Illumina HiSeq2043 |
| Corvus | corone cornix | PL_Wa_H52  | blood  | Poland, Warsaw      | Illumina HiSeq2044 |
| Corvus | corone cornix | RUS_Ki_H02 | blood  | Russia, Kirov       | Illumina HiSeq2045 |
| Corvus | corone cornix | RUS_Ki_H03 | blood  | Russia, Kirov       | Illumina HiSeq2046 |
| Corvus | corone cornix | RUS_Ki_H04 | blood  | Russia, Kirov       | Illumina HiSeq2047 |
| Corvus | corone cornix | RUS_No_H02 | blood  | Russia, Novosibirsk | Illumina HiSeq2048 |
| Corvus | corone cornix | RUS_No_H03 | blood  | Russia, Novosibirsk | Illumina HiSeq2049 |
| Corvus | corone cornix | RUS_Tu_H01 | blood  | Russia, Tyumen      | Illumina HiSeq2050 |
| Corvus | corone cornix | S_Ri_H05   | liver  | Sweden, Rimbo       | Illumina HiSeq2051 |
| Corvus | corone cornix | S_Ri_H07   | liver  | Sweden, Rimbo       | Illumina HiSeq2052 |
| Corvus | corone cornix | S_Ri_H23   | liver  | Sweden, Rimbo       | Illumina HiSeq2053 |

|        |               |          |       |                                |                    |
|--------|---------------|----------|-------|--------------------------------|--------------------|
| Corvus | corone cornix | S_Ri_H29 | liver | Sweden, Rimbo                  | Illumina HiSeq2054 |
| Corvus | corone cornix | S_Ri_H43 | liver | Sweden, Rimbo                  | Illumina HiSeq2055 |
| Corvus | corone cornix | S_Up_H03 | blood | Sweden, Uppsala                | Illumina HiSeq2056 |
| Corvus | corone cornix | S_Up_H09 | blood | Sweden, Uppsala                | Illumina HiSeq2057 |
| Corvus | corone cornix | S_Up_H16 | blood | Sweden, Uppsala                | Illumina HiSeq2058 |
| Corvus | corone cornix | S_Up_H24 | blood | Sweden, Uppsala                | Illumina HiSeq2059 |
| Corvus | corone cornix | S_Up_H29 | blood | Sweden, Uppsala                | Illumina HiSeq2060 |
| Corvus | corone cornix | S_Up_H37 | blood | Sweden, Uppsala                | Illumina HiSeq2061 |
| Corvus | corone cornix | S_Up_H43 | blood | Sweden, Uppsala                | Illumina HiSeq2062 |
| Corvus | corone cornix | S_Up_H47 | blood | Sweden, Uppsala                | Illumina HiSeq2063 |
| Corvus | corone cornix | S_Up_H51 | blood | Sweden, Uppsala                | Illumina HiSeq2064 |
| Corvus | corone cornix | S_Up_H52 | blood | Sweden, Uppsala                | Illumina HiSeq2065 |
| Corvus | corone corone | D_Ko_C02 | blood | Germany, Konstanz              | Illumina HiSeq2066 |
| Corvus | corone corone | D_Ko_C04 | blood | Germany, Konstanz              | Illumina HiSeq2067 |
| Corvus | corone corone | D_Ko_C05 | blood | Germany, Konstanz              | Illumina HiSeq2068 |
| Corvus | corone corone | D_Ko_C08 | blood | Germany, Konstanz              | Illumina HiSeq2069 |
| Corvus | corone corone | D_Ko_C11 | blood | Germany, Konstanz              | Illumina HiSeq2070 |
| Corvus | corone corone | D_Ko_C13 | blood | Germany, Konstanz              | Illumina HiSeq2071 |
| Corvus | corone corone | D_Ko_C15 | blood | Germany, Konstanz              | Illumina HiSeq2072 |
| Corvus | corone corone | D_Ko_C19 | blood | Germany, Konstanz              | Illumina HiSeq2073 |
| Corvus | corone corone | D_Ko_C20 | blood | Germany, Konstanz              | Illumina HiSeq2074 |
| Corvus | corone corone | D_Ra_C01 | blood | Germany, Radolfzell            | Illumina HiSeq2075 |
| Corvus | corone corone | D_Ra_C05 | blood | Germany, Radolfzell            | Illumina HiSeq2076 |
| Corvus | corone corone | D_Ra_C06 | blood | Germany, Radolfzell            | Illumina HiSeq2077 |
| Corvus | corone corone | D_Ra_C11 | blood | Germany, Radolfzell            | Illumina HiSeq2078 |
| Corvus | corone corone | D_Ra_C14 | blood | Germany, Radolfzell            | Illumina HiSeq2079 |
| Corvus | corone corone | D_Ra_C16 | blood | Germany, Radolfzell            | Illumina HiSeq2080 |
| Corvus | corone corone | E_Vi_C01 | blood | Spain, Villaseca de la Sorriba | Illumina HiSeq2081 |
| Corvus | corone corone | E_Vi_C05 | blood | Spain, Villaseca de la Sorriba | Illumina HiSeq2082 |

|        |                                |            |       |                                |                    |
|--------|--------------------------------|------------|-------|--------------------------------|--------------------|
| Corvus | corone corone                  | E_Vi_C08   | blood | Spain, Villaseca de la Sorriba | Illumina HiSeq2083 |
| Corvus | corone corone                  | E_Vi_C14   | blood | Spain, Villaseca de la Sorriba | Illumina HiSeq2084 |
| Corvus | corone corone                  | E_Vi_C19   | blood | Spain, Villaseca de la Sorriba | Illumina HiSeq2085 |
| Corvus | corone corone                  | E_Vi_C22   | blood | Spain, Villaseca de la Sorriba | Illumina HiSeq2086 |
| Corvus | corone corone                  | E_Vi_C23   | blood | Spain, Villaseca de la Sorriba | Illumina HiSeq2087 |
| Corvus | corone corone                  | E_Vi_C32   | blood | Spain, Villaseca de la Sorriba | Illumina HiSeq2088 |
| Corvus | corone corone                  | E_Vi_C37   | blood | Spain, Villaseca de la Sorriba | Illumina HiSeq2089 |
| Corvus | corone corone                  | E_Vi_C44   | blood | Spain, Villaseca de la Sorriba | Illumina HiSeq2090 |
| Corvus | corone corone                  | E_Vi_C46   | blood | Spain, Villaseca de la Sorriba | Illumina HiSeq2091 |
| Corvus | corone corone                  | E_Vi_C48   | blood | Spain, Villaseca de la Sorriba | Illumina HiSeq2092 |
| Corvus | corone corone                  | E_Vi_C51   | blood | Spain, Villaseca de la Sorriba | Illumina HiSeq2093 |
| Corvus | corone corone                  | E_Vi_C57   | blood | Spain, Villaseca de la Sorriba | Illumina HiSeq2094 |
| Corvus | corone corone                  | E_Vi_C58   | blood | Spain, Villaseca de la Sorriba | Illumina HiSeq2095 |
| Corvus | corone coroneXcorone<br>cornix | IRL_Lm_H07 | blood | Ireland, Lough Money Farm      | Illumina HiSeq2096 |
| Corvus | corone coroneXcorone<br>cornix | IRL_Lm_H08 | blood | Ireland, Lough Money Farm      | Illumina HiSeq2097 |
| Corvus | corone coroneXcorone<br>cornix | IRL_Lm_H10 | blood | Ireland, Lough Money Farm      | Illumina HiSeq2098 |
| Corvus | corone coroneXcorone<br>cornix | IRL_Lm_H12 | blood | Ireland, Lough Money Farm      | Illumina HiSeq2099 |
| Corvus | corone coroneXcorone<br>cornix | IRL_Lm_H15 | blood | Ireland, Lough Money Farm      | Illumina HiSeq2100 |
| Corvus | corone coroneXcorone<br>cornix | IRL_Lm_H16 | blood | Ireland, Lough Money Farm      | Illumina HiSeq2101 |
| Corvus | corone coroneXcorone<br>cornix | RUS_Ke_Y01 | blood | Russia, Kemerovo               | Illumina HiSeq2102 |
| Corvus | corone coroneXcorone<br>cornix | RUS_Ke_Y02 | blood | Russia, Kemerovo               | Illumina HiSeq2103 |
| Corvus | corone coroneXcorone<br>cornix | RUS_Ke_Y03 | blood | Russia, Kemerovo               | Illumina HiSeq2104 |
| Corvus | corone coroneXcorone<br>cornix | RUS_Ke_Y05 | blood | Russia, Kemerovo               | Illumina HiSeq2105 |
| Corvus | corone coroneXcorone<br>cornix | RUS_Ke_Y06 | blood | Russia, Kemerovo               | Illumina HiSeq2106 |
| Corvus | corone orientalis              | RUS_Kr_O01 | blood | Russia, Krasnoyarsky           | Illumina HiSeq2107 |
| Corvus | corone orientalis              | RUS_Kr_O02 | blood | Russia, Krasnoyarsky           | Illumina HiSeq2108 |



|        |                      |            |               |                      |                    |
|--------|----------------------|------------|---------------|----------------------|--------------------|
| Corvus | corone orientalis    | RUS_Kr_O03 | blood         | Russia, Krasnoyarsky | Illumina HiSeq2109 |
| Corvus | corone orientalis    | RUS_Kr_O04 | blood         | Russia, Krasnoyarsky | Illumina HiSeq2110 |
| Corvus | corone orientalis    | RUS_Pr_O01 | tissue, blood | Russia, Primorsky    | Illumina HiSeq2111 |
| Corvus | corone orientalis    | RUS_Pr_O02 | tissue, blood | Russia, Primorsky    | Illumina HiSeq2112 |
| Corvus | corone orientalis    | RUS_Pr_O03 | tissue, blood | Russia, Primorsky    | Illumina HiSeq2113 |
| Corvus | corone orientalis    | RUS_Pr_O04 | tissue, blood | Russia, Primorsky    | Illumina HiSeq2114 |
| Corvus | corone orientalis    | RUS_Pr_O05 | tissue, blood | Russia, Primorsky    | Illumina HiSeq2115 |
| Corvus | corone orientalis    | RUS_Tv_O01 | blood         | Russia, Tuva         | Illumina HiSeq2116 |
| Corvus | corone orientalis    | RUS_Tv_O02 | blood         | Russia, Tuva         | Illumina HiSeq2117 |
| Corvus | corone orientalis    | RUS_Ya_O01 | tissue        | Russia, Yakutsk      | Illumina HiSeq2118 |
| Corvus | corone orientalis    | RUS_Ya_O02 | blood         | Russia, Yakutsk      | Illumina HiSeq2119 |
| Corvus | corone orientalis    | RUS_Ya_O03 | blood         | Russia, Yakutsk      | Illumina HiSeq2120 |
| Corvus | dauricus             | CHN_Gu_D02 | liver         | China, Guangxi       | Illumina HiSeq2121 |
| Corvus | dauricus             | MON_Kh_D01 | blood         | Mongolia, Khentii    | Illumina HiSeq2122 |
| Corvus | dauricus             | MON_Kh_D02 | blood         | Mongolia, Khentii    | Illumina HiSeq2123 |
| Corvus | dauricus             | MON_Kh_D03 | blood         | Mongolia, Khentii    | Illumina HiSeq2124 |
| Corvus | monedula             | S_Ri_J01   | liver         | Sweden, Rimbo        | Illumina HiSeq2125 |
| Corvus | monedula             | S_Ri_J02   | liver         | Sweden, Rimbo        | Illumina HiSeq2126 |
| Corvus | monedula             | S_Ri_J03   | liver         | Sweden, Rimbo        | Illumina HiSeq2127 |
| Corvus | monedula             | S_Ri_J08   | liver         | Sweden, Rimbo        | Illumina HiSeq2128 |
| Corvus | pectoralis/torquatus | CHN_Gu_P01 | tissue        | China, Guangxi       | Illumina HiSeq2129 |
| Corvus | pectoralis/torquatus | Un_un_P01  | tissue        | unknown              | Illumina HiSeq2130 |
| Corvus | pectoralis/torquatus | Un_un_P02  | tissue        | unknown              | Illumina HiSeq2131 |
| Corvus | corone cornix        | S_Up_H32   | blood         | Sweden,Uppsala       | PacBio RSII        |
| Corvus | corone cornix        | S_Up_H03   | blood         | Sweden,Uppsala       | PacBio Sequel      |
| Corvus | corone cornix        | S_Up_H47   | blood         | Sweden,Uppsala       | PacBio RSII        |
| Corvus | corone cornix        | S_Up_H37   | blood         | Sweden,Uppsala       | PacBio Sequel      |
| Corvus | corone cornix        | S_Up_H24   | blood         | Sweden,Uppsala       | PacBio RSII        |
| Corvus | corone cornix        | S_Up_H29   | blood         | Sweden,Uppsala       | PacBio RSII        |

|        |                |            |       |                        |               |
|--------|----------------|------------|-------|------------------------|---------------|
| Corvus | corone cornix  | S_Up_H59   | blood | Sweden,Uppsala         | PacBio Sequel |
| Corvus | corone cornix  | Pl_Wa_H22  | blood | Poland,Warsaw          | PacBio RSII   |
| Corvus | corone cornix  | Pl_Wa_H24  | blood | Poland,Warsaw          | PacBio RSII   |
| Corvus | corone corone  | D_Ko_C04   | blood | Germany,Konstanz       | PacBio RSII   |
| Corvus | corone corone  | D_Ko_C13   | blood | Germany,Konstanz       | PacBio RSII   |
| Corvus | corone corone  | D_Ko_C15   | blood | Germany,Konstanz       | PacBio Sequel |
| Corvus | corone corone  | D_Ko_C29   | blood | Germany,Konstanz       | PacBio RSII   |
| Corvus | corone corone  | D_Ra_C16   | blood | Germany,Radolfzell     | PacBio Sequel |
| Corvus | corone corone  | D_Ko_C36   | blood | Germany,Konstanz       | PacBio Sequel |
| Corvus | corone corone  | D_Ra_C05   | blood | Germany,Radolfzell     | PacBio Sequel |
| Corvus | corone corone  | D_Ko_C31   | blood | Germany,Konstanz       | PacBio Sequel |
| Corvus | corone corone  | E_Vi_C57   | blood | Spain,La Sorriba       | PacBio RSII   |
| Corvus | corone corone  | E_Vi_C58   | blood | Spain,La Sorriba       | PacBio RSII   |
| Corvus | corone corone  | E_Vi_C98   | blood | Spain,La Sorriba       | PacBio Sequel |
| Corvus | corone corone  | E_Vi_C100  | blood | Spain,La Sorriba       | PacBio Sequel |
| Corvus | corone corone  | E_Vi_C101  | blood | Spain,La Sorriba       | PacBio Sequel |
| Corvus | corone corone  | E_Vi_C103  | blood | Spain,La Sorriba       | PacBio RSII   |
| Corvus | brachyrhynchos | USA_Wa_B01 | blood | USA,Seattle            | PacBio RSII   |
| Corvus | brachyrhynchos | USA_Wa_B02 | blood | USA,Seattle            | PacBio RSII   |
| Corvus | monedula       | S_Up_J01   | blood | Sweden,Uppsala         | PacBio RSII   |
| Corvus | monedula       | S_To_J13   | blood | Sweden,Aspa            | PacBio Sequel |
| Corvus | monedula       | S_To_J10   | blood | Sweden,Aspa            | PacBio Sequel |
| Corvus | monedula       | S_To_J14   | blood | Sweden,Aspa            | PacBio RSII   |
| Corvus | monedula       | S_To_J15   | blood | Sweden,Aspa            | PacBio RSII   |
| Corvus | dauricus       | RUS_Mp_D04 | blood | Russia,Muraviovka Park | PacBio Sequel |
| Corvus | dauricus       | RUS_Mp_D06 | blood | Russia,Muraviovka Park | PacBio Sequel |
| Corvus | dauricus       | RUS_Mp_D08 | blood | Russia,Muraviovka Park | PacBio Sequel |
| Corvus | corone corone  | D_Ra_C05   | blood | Germany, Radolfzell    | BioNano Irys  |
| Corvus | corone corone  | D_Ko_C04   | blood | Germany, Konstanz      | BioNano Irys  |

|        |               |           |       |                   |              |
|--------|---------------|-----------|-------|-------------------|--------------|
| Corvus | corone corone | D_Ko_C13  | blood | Germany, Konstanz | BioNano Irys |
| Corvus | corone corone | D_Ko_C29  | blood | Germany, Konstanz | BioNano Irys |
| Corvus | corone corone | D_Ko_C36  | blood | Germany, Konstanz | BioNano Irys |
| Corvus | corone corone | E_Vi_C101 | blood | Spain,La Sorriba  | BioNano Irys |
| Corvus | corone corone | E_Vi_C103 | blood | Spain,La Sorriba  | BioNano Irys |
| Corvus | corone corone | E_Vi_C57  | blood | Spain,La Sorriba  | BioNano Irys |
| Corvus | corone corone | E_Vi_C58  | blood | Spain,La Sorriba  | BioNano Irys |
| Corvus | monedula      | S_To_J17  | blood | Sweden, Tovetorp  | BioNano Irys |
| Corvus | corone cornix | S_Up_H03  | blood | Sweden, Uppsala   | BioNano Irys |
| Corvus | corone cornix | S_Up_H29  | blood | Sweden, Uppsala   | BioNano Irys |
| Corvus | corone cornix | S_Up_H32  | blood | Sweden, Uppsala   | BioNano Irys |
| Corvus | corone cornix | S_Up_H37  | blood | Sweden, Uppsala   | BioNano Irys |
| Corvus | corone cornix | S_Up_H59  | blood | Sweden, Uppsala   | BioNano Irys |
| Corvus | monedula      | S_Up_J01  | blood | Sweden, Uppsala   | BioNano Irys |

**Table S6.**

Statistics of optical maps and map assemblies.

| Sample    | data over 150<br>Kbp | N50 (Mbp) | Maprate to <i>Corvus cornix</i><br>assembly | N50   | genome size | Eff coverage |
|-----------|----------------------|-----------|---------------------------------------------|-------|-------------|--------------|
| D_Ra_C05  | 313.7037 Gbp         | 0.2272    | 52.40%                                      | 0.759 | 1202.661    | 106.71       |
| E_Vi_C58  | 149.5706 Gbp         | 0.2111    | 44.00%                                      | 0.755 | 1135.633    | 44.05        |
| S_Up_H59  | 132.0199 Gbp         | 0.2109    | 50.60%                                      | 0.798 | 1136.396    | 75.20        |
| D_Ko_C29  | 113.2390 Gbp         | 0.2164    | 45.70%                                      | 0.647 | 1154.888    | 47.49        |
| E_Vi_C101 | 221.5878 Gbp         | 0.2566    | 71.30%                                      | 1.064 | 1306.967    | 130.50       |
| S_To_J17  | 200.8957 Gbp         | 0.2336    | 36.40%                                      | 0.882 | 1309.932    | 94.89        |
| S_Up_H32  | 107.2551 Gbp         | 0.2171    | 67.20%                                      | 0.763 | 1108.333    | 59.74        |
| S_Up_J01  | 188.0292 Gbp         | 0.2438    | 29.30%                                      | 0.812 | 1201.969    | 73.28        |
| D_Ko_C04  | 58 Gbp               | 0.1426    | 49.70%                                      | 0.223 | 529.43      | 19.89        |
| D_Ko_C13  | 48.0589 Gbp          | 0.1978    | 54.30%                                      | 0.4   | 1291.57     | 32.78        |
| D_Ko_C36  | 141.6023 Gbp         | 0.2278    | 69.00%                                      | 1.044 | 1236.42     | 82.23        |
| E_Vi_C103 | 194.30 Gbp           | 0.2516    | 65.20%                                      | 0.848 | 1207.24     | 93.00        |
| E_Vi_C57  | 356.49 Gbp           | 0.2167    | 55.80%                                      | 0.726 | 1449.28     | 166.50       |
| S_Up_H03  | 178.58 Gbp           | 0.2311    | 66.50%                                      | 0.826 | 1192.34     | 89.78        |
| S_Up_H29  | 141.49 Gbp           | 0.2488    | 70.70%                                      | 0.824 | 1203.84     | 85.12        |
| S_Up_H37  | 166.40 Gbp           | 0.2411    | 68.40%                                      | 0.829 | 1216.61     | 99.61        |
